# Supplementary material for: Single-Cell Transcriptomics Revealed Subtype-Specific Tumor Immune Microenvironments in Human Glioblastomas
Source: Front Immunol. 2022 May 20;13:914236. doi: 10.3389/fimmu.2022.914236 (PMC9163377; doi:10.3389/fimmu.2022.914236)
Supplement: Supplementary Table 1 — Patient Information. [file Table_1.xlsx]

## Sheet: Sheet1
Patient Information
Patient	Gender	Age	Pathology	WHO Grade	IDH	TERT	MGMT
1	female	50	pGBM	Ⅳ	wild	C228T mutation	methylation
2	male	62	pGBM	Ⅳ	wild	wild	methylation
3	male	56	pGBM	Ⅳ	wild	wild	un-methylation
4	male	70	pGBM	Ⅳ	wild	C250T mutation	un-methylation
5	male	70	pGBM	Ⅳ	wild	C228T mutation	un-methylation
6	male	78	pGBM	Ⅳ	wild	wild	methylation
7	male	50	pGBM	Ⅳ	wild	C250T mutation	methylation
a. pGBM, primary glioblastoma; b. WHO, World Health Organization; c. IDH, isocitrate dehydrogenase; d. TERT, telomerase reverse transcriptase; e. MGMT, O-6-methylguanine-DNA methyltransferase.
