# Supplementary material for: Single-Cell Transcriptomics Revealed Subtype-Specific Tumor Immune Microenvironments in Human Glioblastomas
Source: Front Immunol. 2022 May 20;13:914236. doi: 10.3389/fimmu.2022.914236 (PMC9163377; doi:10.3389/fimmu.2022.914236)
Supplement: Supplementary Table 2 — Evaluation of scRNA-seq Data Quality. [file Table_2.xlsx]

## Sheet: Sheet1
Evaluation of Single Cell RNA Sequence Quality
Patient	Cell number	Cell reads percent	Saturation	Mean reads/cell	Median UMIs	Total genes	Median genes
1	4461	0.6927	0.6087	102247	4252	35966	1623
2	2643	0.6746	0.69	82399	2390	28928	1053
3	3196	0.5797	0.6634	88271	2097	30281	1068
4	3196	0.7477	0.6606	108728	5003	30331	1740
5	6292	0.7069	0.7175	98639	3468	37089	1488
6	2926	0.5669	0.6378	101874	2527	31166	1170
7	5565	0.6835	0.6934	105835	4903	34468	2098
a. UMI, unique molecular index.
