# Supplementary material for: Single-Cell Transcriptomics Revealed Subtype-Specific Tumor Immune Microenvironments in Human Glioblastomas
Source: Front Immunol. 2022 May 20;13:914236. doi: 10.3389/fimmu.2022.914236 (PMC9163377; doi:10.3389/fimmu.2022.914236)
Supplement: Supplementary Table 3 — GBM Cellular States and Cell Type Constitutions. [file Table_3.xlsx]

## Sheet: Sheet1
Glioblastoma Cellular States and Cell Type Constitutions
	Patient1	Patient2	Patient3	Patient4	Patient5	Patient6	Patient7	ALL
AC-like Cell	601	48	331	23	703	66	280	2052
MES1-like Cell	278	118	10	365	13	7	171	962
MES2-like Cell	13	19	55	212	42	17	21	379
OPC-like Cell	0	2	215	1	8	290	681	1197
NPC1-like Cell	0	2	53	0	241	723	98	1117
NPC2-like Cell	2	0	16	0	32	70	1604	1724
Stem-like Cell	16	19	45	0	135	27	46	288
Un-annotated Tumor Cell	618	142	917	8	611	814	233	3343
Oligodendrocyte	0	34	25	32	349	34	733	1207
Endothelial Cell	6	3	18	2	92	8	7	136
Pericyte	9	4	72	21	106	11	12	235
T cell	29	55	26	29	263	3	12	417
TAM-0	562	1377	114	332	1797	93	519	4794
TAM-1	122	121	42	1029	161	4	115	1594
TAM-2	26	136	10	158	200	12	49	591
TAM-3	4	99	2	17	28	5	8	163
NA	48	2	23	7	6	2	2	90
a. AC-like, astrocyte-like; b. MES-like, mesenchymal-like; c. OPC-like, oligodendrocyte-progenitor-like; d. NPC-like, neural-progenitor-like; e. Un-annotated Tumor Cell, glioblastoma tumor cells cannot be annotated to specific cellular states; f. TAM, tumor-associated macrophages/microglia; NA, un-annotated cell type.
