# Supplementary material for: Single-Cell Transcriptomics Revealed Subtype-Specific Tumor Immune Microenvironments in Human Glioblastomas
Source: Front Immunol. 2022 May 20;13:914236. doi: 10.3389/fimmu.2022.914236 (PMC9163377; doi:10.3389/fimmu.2022.914236)
Supplement: Supplementary Table 4 — Top20 Regulons in Cellular States. [file Table_4.xlsx]

## Sheet: Regulon tumor
Top20 Regulons in Cellular States
AC-like		MES1-like		MES2-like		OPC-like		NPC1-like		NPC2-like		Stem-like
Regulon	Score	Regulon	Score	Regulon	Score	Regulon	Score	Regulon	Score	Regulon	Score	Regulon	Score
TRPS1 (14g)	0.448295	FOSL1 (253g)	0.320386	CEBPG (34g)	0.17334	VAX2_extended (29g)	0.373886	SIX6 (15g)	0.346279	OTP (16g)	0.537154	MYBL2 (11g)	0.135542
SOX9 (17g)	0.434082	STAT3 (184g)	0.289523	FOSL1 (253g)	0.164566	NKX2-2_extended (67g)	0.34896	SOX3_extended (86g)	0.330988	NHLH2 (41g)	0.494331	E2F8 (40g)	0.107563
MECOM (18g)	0.401873	MAFF (23g)	0.288734	EPAS1 (43g)	0.164031	TCF7L2 (28g)	0.320503	OLIG1_extended (16g)	0.321016	SHOX2_extended (24g)	0.474896	EZH2 (89g)	0.103314
RFX4 (129g)	0.396029	CEBPD (12g)	0.285463	NFKB1 (84g)	0.15165	SOX6_extended (271g)	0.284805	ETV1_extended (57g)	0.295524	HES4 (30g)	0.449642	ETV4_extended (25g)	0.096737
FOXB1_extended (54g)	0.39491	NFATC2 (82g)	0.282289	DDIT3 (58g)	0.140551	SOX8 (82g)	0.276945	SOX5 (10g)	0.289114	MEIS2 (21g)	0.420038	HOXB4 (43g)	0.0933952
GLIS3_extended (15g)	0.390387	RUNX1 (35g)	0.281436	NR2F6 (10g)	0.139436	OLIG1_extended (16g)	0.268142	OLIG2_extended (44g)	0.288555	BHLHE22_extended (96g)	0.401606	VAX1_extended (214g)	0.0924943
LEF1 (69g)	0.386799	ETS2 (135g)	0.277209	RELA_extended (593g)	0.139434	OLIG2_extended (44g)	0.267322	ZMIZ1 (212g)	0.286916	NEUROD1 (17g)	0.38441	HOXB2_extended (49g)	0.0907942
IRF2 (997g)	0.378383	FOSL2 (675g)	0.272724	RUNX1 (35g)	0.134295	SOX10 (755g)	0.261296	ZEB1 (17g)	0.281806	NHLH1 (123g)	0.380264	HOXB3_extended (59g)	0.0893543
RFX3 (1206g)	0.371413	STAT2 (506g)	0.263654	STAT3 (184g)	0.132203	TCF12 (18g)	0.249818	NR3C1 (11g)	0.281094	NFYC_extended (208g)	0.356808	HOXC10 (47g)	0.0891715
FOXC1_extended (373g)	0.36922	FOSB (112g)	0.260923	ETS2 (135g)	0.13107	OSR1 (50g)	0.24916	SIX1 (25g)	0.276014	ZNF711 (19g)	0.335286	ETV5 (22g)	0.0886488
RFX2 (1462g)	0.365824	CEBPB (639g)	0.259888	MAX_extended (646g)	0.130511	ELF1_extended (82g)	0.248978	GSX1 (24g)	0.267536	MAZ_extended (1818g)	0.331045	POU3F1 (150g)	0.0875981
CEBPD (12g)	0.36546	NFKB1 (84g)	0.257886	MAFB (36g)	0.12888	SOX3_extended (86g)	0.247281	SOX8 (82g)	0.261024	FOXP1_extended (24g)	0.329251	HOXD8 (22g)	0.0868815
NFE2L2_extended (60g)	0.360671	MAFB (36g)	0.255291	ELK3_extended (123g)	0.128207	LUZP2 (23g)	0.242304	TCF12 (18g)	0.250843	EZH2 (89g)	0.327602	HOXC11 (31g)	0.0852821
MEF2C_extended (50g)	0.358486	EPAS1 (43g)	0.253918	CREB3 (430g)	0.126934	BRF2_extended (335g)	0.212934	SOX11 (12g)	0.250486	MYBL2 (11g)	0.327408	CREB5 (30g)	0.0852182
BCL3_extended (106g)	0.349751	NFIC (27g)	0.252181	CEBPB (639g)	0.123551	RFX5 (25g)	0.211539	ARID3A_extended (52g)	0.246115	E2F2 (154g)	0.324256	HOXB7 (173g)	0.0850475
IRF1 (1132g)	0.348822	ELK3_extended (123g)	0.251603	ATF4 (259g)	0.123502	SOX5 (10g)	0.210904	SOX6_extended (271g)	0.242694	E2F1 (620g)	0.313677	HOXA7 (29g)	0.0840944
ETV5 (22g)	0.346278	EGR3 (95g)	0.249193	ATF6 (101g)	0.123433	ETV1_extended (57g)	0.207033	LUZP2 (23g)	0.240099	POU3F3_extended (13g)	0.313137	HOXC9 (45g)	0.083332
FOSB (112g)	0.345333	RELB (148g)	0.245422	XBP1 (914g)	0.122988	E2F3 (3185g)	0.202776	MEF2A (283g)	0.237449	YBX1 (367g)	0.301499	HOXA10 (38g)	0.0828797
HOXB7 (173g)	0.344363	IRF7 (200g)	0.242153	CREB3L2_extended (22g)	0.121104	SOX4 (827g)	0.200038	CHD2 (871g)	0.23691	HDAC2 (1854g)	0.30057	DMRTA2 (263g)	0.0824427
REST_extended (277g)	0.342993	IRF1 (1132g)	0.238283	RELB (148g)	0.121036	POLE4_extended (1101g)	0.197492	HOXC9 (45g)	0.23189	NPDC1_extended (314g)	0.297579	MEF2C_extended (50g)	0.0812124
