# Supplementary material for: Single-Cell Transcriptomics Revealed Subtype-Specific Tumor Immune Microenvironments in Human Glioblastomas
Source: Front Immunol. 2022 May 20;13:914236. doi: 10.3389/fimmu.2022.914236 (PMC9163377; doi:10.3389/fimmu.2022.914236)
Supplement: Supplementary Table 5 — Top20 Regulons in TAMs. [file Table_5.xlsx]

## Sheet: Sheet1
Top20 Regulons in TAMs
TAM-0		TAM-1		TAM-2		TAM-3
Regulon	Score	Regulon	Score	Regulon	Score	Regulon	Score
AKR1A1_extended (14g)	0.621688	SOX4 (232g)	0.367804	MYBL2 (24g)	0.490363	HESX1_extended (12g)	0.202704
MEF2A_extended (66g)	0.612637	FOSL1 (189g)	0.335769	E2F8 (233g)	0.345043	NFE2L3_extended (18g)	0.123352
IKZF1_extended (645g)	0.60839	FOXP1_extended (68g)	0.31524	EZH2 (80g)	0.340761	IRF5 (74g)	0.084559
FOXN3_extended (33g)	0.603109	EPAS1 (777g)	0.296815	E2F2 (279g)	0.325689	BATF3_extended (12g)	0.0671793
EGR3 (350g)	0.600714	FOSL2 (38g)	0.288995	POLE3 (119g)	0.299806	IRF1 (300g)	0.0632104
HES1_extended (19g)	0.597544	VDR_extended (66g)	0.28415	E2F1 (334g)	0.276079	STAT1 (589g)	0.0625906
MXD4_extended (258g)	0.596226	PSMD12 (29g)	0.284052	E2F7 (677g)	0.264603	OLIG2 (48g)	0.0611539
SPI1 (807g)	0.595859	MXI1_extended (2849g)	0.280107	BRCA1 (388g)	0.262111	SREBF1 (34g)	0.0579642
MYC_extended (1249g)	0.594827	HIF1A (516g)	0.275556	RAD21 (90g)	0.197672	IRF7 (686g)	0.0560332
SOX2 (286g)	0.59143	ATF6 (95g)	0.270169	FOXM1_extended (17g)	0.186494	STAT2 (1161g)	0.0514455
ETV6_extended (804g)	0.585865	STAT3 (22g)	0.264654	NFYB (87g)	0.169453	ZNF607_extended (77g)	0.0508303
POU2F2 (38g)	0.584116	CREM (192g)	0.264053	TFDP1 (2146g)	0.145874	CEBPD (121g)	0.050783
CEBPD (121g)	0.583833	ARNT (58g)	0.262158	XRCC4_extended (2221g)	0.129518	EHF_extended (15g)	0.0478545
ELK4 (826g)	0.582649	XRCC4_extended (2221g)	0.261045	SAP30_extended (359g)	0.123173	DDIT3 (22g)	0.0476003
IRF8 (672g)	0.582574	ATF3 (2202g)	0.25705	E2F3 (1521g)	0.11971	IRF8 (672g)	0.046839
ATF1_extended (1737g)	0.582345	BCL3 (71g)	0.256654	UQCRB (741g)	0.117723	JUN (27g)	0.0468253
ELF2 (3577g)	0.579138	RREB1_extended (409g)	0.256013	YY1 (1513g)	0.116435	KLF4_extended (21g)	0.0451286
CHD2 (2030g)	0.578405	ZMIZ1_extended (4357g)	0.255359	NR3C1 (220g)	0.11524	ETV6_extended (804g)	0.0448324
FLI1 (324g)	0.57645	FOSB (171g)	0.253223	SUZ12_extended (3407g)	0.115045	FOS (27g)	0.0448264
PBX3_extended (368g)	0.576058	MAFF_extended (1131g)	0.252542	GTF2F1 (3609g)	0.114914	STAT3 (22g)	0.0447172
