# Supplementary material for: Single-Cell Transcriptomics Revealed Subtype-Specific Tumor Immune Microenvironments in Human Glioblastomas
Source: Front Immunol. 2022 May 20;13:914236. doi: 10.3389/fimmu.2022.914236 (PMC9163377; doi:10.3389/fimmu.2022.914236)
Supplement: Supplementary Table 6 — DEG signatures of TAMs. [file Table_6.xlsx]

## Sheet: Sheet1
DEG signatures of TAMs
TAM-0			TAM-1			TAM-2			TAM-3
gene	avg_logFC	p_val_adj	gene	avg_logFC	p_val_adj	gene	avg_logFC	p_val_adj	gene	avg_logFC	p_val_adj
CCL4L2	0.997224	1.03765e-101	VCAN	1.83476	0	TOP2A	2.13938	0	CXCL10	3.19437	8.88479e-213
TREM2	0.917412	0	CXCL5	1.81552	5.10651e-177	HIST1H4C	1.85194	7.53864e-146	CXCL11	2.49328	2.79263e-196
APOE	0.877141	0	RNASE1	1.78637	0	CENPF	1.80718	0	ISG15	2.14101	5.7983e-104
APOC1	0.854925	6.17265e-283	TIMP1	1.54545	2.47288e-222	NUSAP1	1.78314	0	TNFSF10	2.12405	6.96812e-146
C3	0.850461	7.56746e-237	CXCL3	1.51776	0	MKI67	1.76093	0	IFIT2	2.09588	2.76247e-131
CCL3	0.849332	3.58249e-56	CTSL	1.46958	2.00318e-248	STMN1	1.56983	6.21197e-276	IFIT1	2.00979	3.05268e-179
A2M	0.840454	6.34645e-217	S100A9	1.33304	1.38608e-137	H2AFZ	1.54041	8.83184e-282	IFIT3	1.98914	2.33036e-127
CCL3L1	0.839338	2.00263e-94	FN1	1.30542	1.78082e-133	HMGB2	1.36801	4.85199e-189	RSAD2	1.95204	6.21372e-196
OLR1	0.829625	5.86506e-207	CXCL2	1.26757	8.28361e-265	HMGN2	1.28738	6.58919e-187	NT5C3A	1.63783	7.9323e-109
CCL4	0.812329	1.08238e-63	ANGPTL4	1.26543	0	PCLAF	1.27783	0	GBP1	1.60755	1.53926e-56
HLA-DMB	0.782574	1.19736e-211	PLIN2	1.26238	1.23052e-254	TUBB	1.27492	6.7464e-201	MX1	1.4714	1.22251e-78
IGSF6	0.760054	1.62876e-124	CXCL1	1.25667	2.62981e-204	HIST1H1D	1.26242	3.78046e-144	IFITM3	1.42009	1.69831e-70
			S100A8	1.18248	9.13816e-57	HMGB1	1.19832	4.21143e-243	ISG20	1.36016	3.19457e-106
			SLC16A10	1.11915	0	HIST1H1E	1.16634	2.83371e-101	GBP4	1.34781	1.06919e-81
			ADM	1.09718	3.22047e-265	BIRC5	1.15634	0	CCL8	1.33841	2.82533e-24
			S100A10	1.06567	0	ASPM	1.13106	0	IFIH1	1.32634	5.34302e-68
			TGFBI	1.06302	5.81491e-196	CEP55	1.09243	0	IFI6	1.31409	9.84591e-55
			MT1G	1.05766	1.23874e-55	SMC4	1.09237	1.077e-232	HERC5	1.29972	1.33332e-82
			CSTB	1.04535	5.69777e-183	CDK1	1.09072	0	EPSTI1	1.20194	1.36831e-47
			SLC2A3	1.02747	1.59986e-193	UBE2C	1.08923	0	IFI27	1.19585	1.85772e-30
			LYVE1	1.02425	4.76622e-195	PTTG1	1.08626	8.56624e-237	CCL5	1.15786	2.10056e-09
			THBS1	1.02194	7.22417e-171	FAM111B	1.08306	0	LY6E	1.14052	1.70243e-48
			THBD	0.999695	2.33086e-188	HMMR	1.07934	0	MX2	1.1336	1.26861e-65
			EREG	0.990767	3.98279e-111	CKAP2	1.05786	8.12707e-151	IFI35	1.08419	7.19145e-49
			AREG	0.984461	2.57696e-94	TUBA1B	1.04345	1.41742e-11	NEXN	1.0367	3.32625e-185
			MARCO	0.980217	9.24572e-226	HMGB1P5	1.04173	2.23226e-161	SAMD9	1.01691	5.70072e-36
			CTSB	0.952994	1.08062e-172	DUT	1.039	1.87966e-137	MT2A	0.991662	9.93224e-29
			GLUL	0.949783	1.26311e-178	CENPU	1.03281	0	APOBEC3A	0.977424	2.80132e-69
			HSP90B1	0.947053	1.35574e-104	TPX2	1.02849	0	STAT1	0.961137	1.32156e-36
			SDC2	0.943061	1.73912e-284	GTSE1	1.02174	0	OAS1	0.946803	5.15526e-35
			MRC1	0.892684	7.17533e-147	DLGAP5	1.01681	0	SP110	0.93362	6.90998e-31
			VIM	0.874734	1.66554e-275	CENPE	1.01221	9.56861e-217	DDX58	0.916859	6.96284e-47
			PGK1	0.868225	3.61721e-221	RAD51AP1	0.998611	1.75294e-298	OASL	0.916581	3.2995e-55
			ENO1	0.863375	1.4833e-216	TYMS	0.97644	0	TNFSF13B	0.908608	8.78842e-27
			CCL20	0.849373	1.29087e-93	ESCO2	0.967519	0	NUPR1	0.90605	1.00763e-14
			PKM	0.835837	1.17673e-225	ATAD2	0.940925	3.70965e-273	NMI	0.889853	1.78753e-30
			ANXA1	0.816366	2.31872e-190	CLSPN	0.937824	0	SAMD9L	0.881825	1.77776e-32
			APLP2	0.814964	1.05007e-199	DEK	0.924181	4.60004e-143	IFI44L	0.859464	1.46105e-34
			MMP19	0.813205	2.71288e-237	TK1	0.921807	0	IFI44	0.850134	1.03223e-30
			HMOX1	0.803638	7.27363e-42	SMC2	0.914456	2.93445e-185	APOL6	0.849536	1.52258e-28
			ERO1A	0.790271	6.87357e-212	CKS1B	0.914245	0	LAP3	0.821937	2.05834e-26
			LDHA	0.773089	3.83831e-164	PCNA	0.911758	6.22501e-208	VAMP5	0.821629	3.96566e-20
			PDIA4	0.772094	4.96241e-97	PRR11	0.896075	3.99905e-188	OLFML3	0.818542	5.16562e-15
			PMP22	0.770006	5.00851e-136	TMPO	0.873877	3.06744e-140	RABGAP1L	0.807869	7.64604e-26
			CD44	0.765182	7.39198e-201	GMNN	0.869793	5.69568e-182	NUB1	0.792443	2.53655e-16
			CD163	0.758904	7.29486e-156	DTYMK	0.85288	7.11591e-200	RNF213	0.775525	5.19983e-15
						RRM2	0.848115	0	EIF2AK2	0.773388	6.36741e-25
						FAM111A	0.846326	3.32694e-142	SERPING1	0.769769	2.09435e-23
						SGO2	0.822541	1.16722e-211	XAF1	0.767453	4.44793e-16
						CENPK	0.820578	0	CMPK2	0.765282	7.91446e-75
						HMGN2P5	0.816242	1.51197e-146	PSME2	0.75898	1.34162e-16
						NUCKS1	0.810662	1.82822e-121	IFITM2	0.75257	4.75933e-21
						CDKN3	0.805415	0	IRF7	0.751664	7.3902e-24
						HELLS	0.797433	6.5822e-262
						SPDL1	0.794548	9.18354e-212
						CDC20	0.791326	0
						TACC3	0.787156	4.31351e-272
						KNL1	0.783686	0
						AURKA	0.777194	3.936e-206
						H2AFV	0.770419	2.54595e-104
						DNMT1	0.767823	2.77726e-101
						NASP	0.756453	2.04245e-105
						TTK	0.75539	0
						PTMA	0.753125	1.63249e-202
