# Supplementary material for: Single-Cell Transcriptomics Revealed Subtype-Specific Tumor Immune Microenvironments in Human Glioblastomas
Source: Front Immunol. 2022 May 20;13:914236. doi: 10.3389/fimmu.2022.914236 (PMC9163377; doi:10.3389/fimmu.2022.914236)
Supplement: Supplementary Table 7 — Antibodies used in this study. [file Table_7.xlsx]

## Sheet: Sheet1
Antibodies used in this study
Antibody	Supplier	Catalog number	Dilution (usage)
CD14	Servicebio	GB14023	1:200
ERO1A	Affinity	DF12984	1:200
HRP conjugated Goat Anti-Mouse IgG (H+L)	Servicebio	GB23301	1:500
Alexa Fluor® 488-conjugated Goat Anti-Rabbit IgG (H+L)	Servicebio	GB25303	1:400
Cy5 conjugated Goat Anti-MOUSE IgG (H+L)	Servicebio	GB27301	1:400
